# Supplementary material
Source: Springer Nature journal article supplement (https://www.springermedizin.de/resource/supplementary/13054_2012_691_MOESM7_ESM.pdf/9709018)

LoP-C

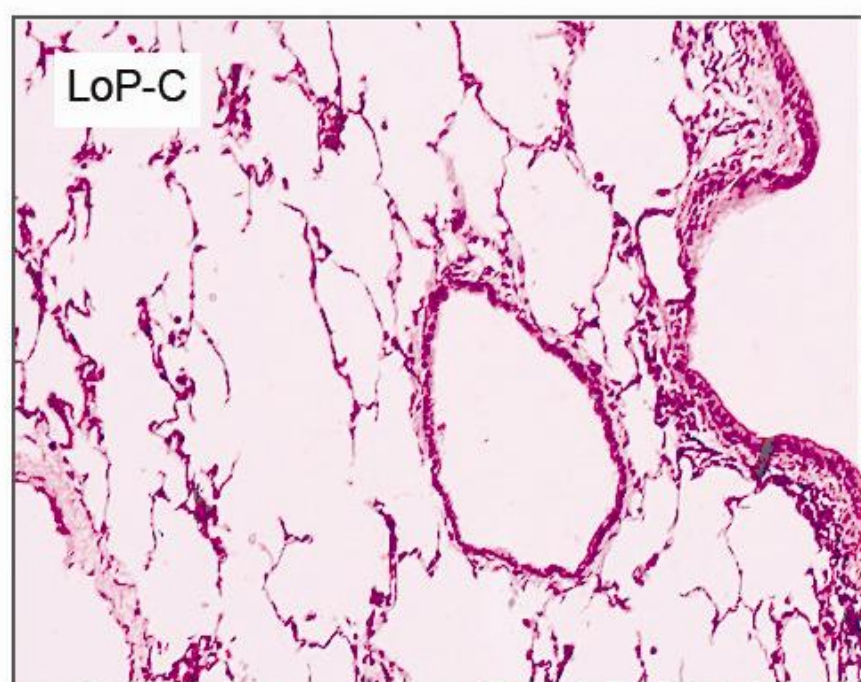

HiP-C

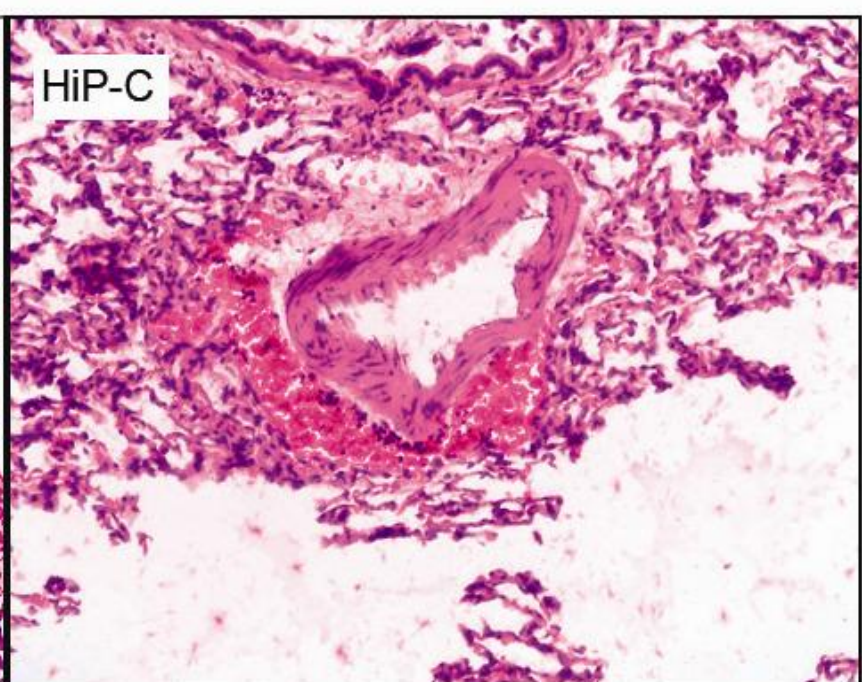

HiP-Met

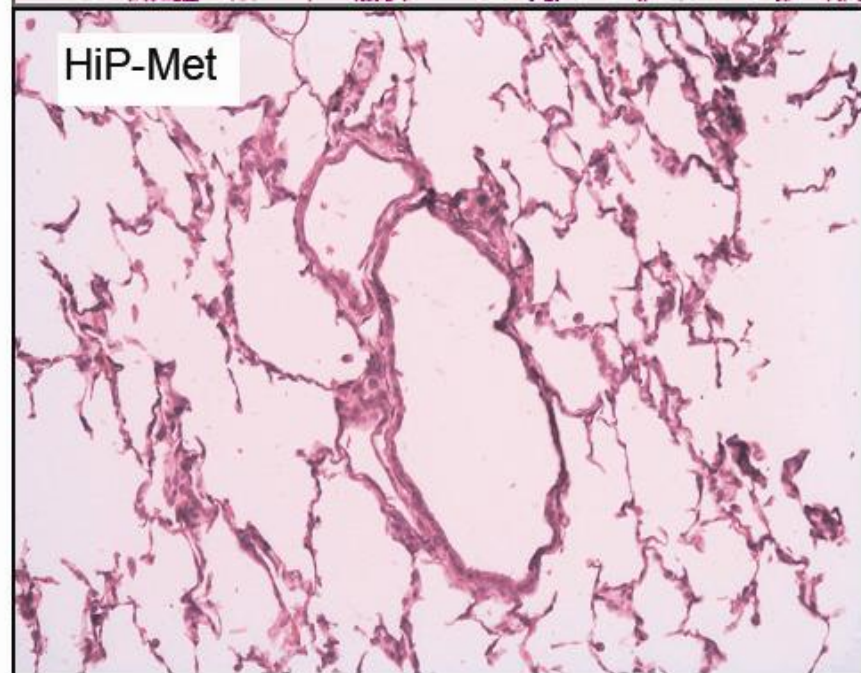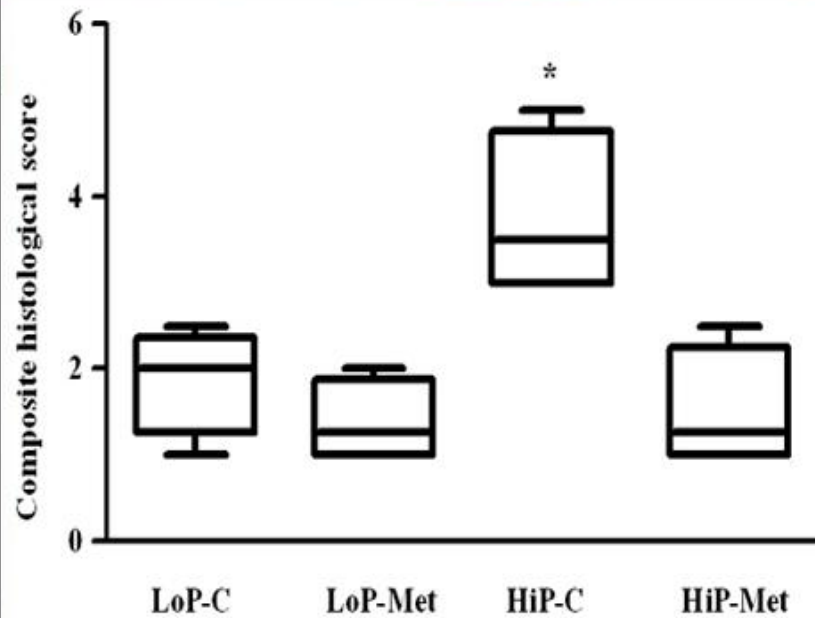

Supplement: MOESM7 [file 9709018]
